1 ***“People will not even bring out their children to be immunised, because of the corona***  
2 ***vaccine”***: fake news, misinformation, vaccine hesitancy and the role of community  
3 **engagement in COVID-19 vaccine acceptance in Southern Ghana**

4  
5 Mawulom Kuatewo<sup>1</sup> Wisdom Ebelin<sup>2\*</sup>, Phidelia Theresa Doegah<sup>3</sup>, Lebene Kpodo<sup>4</sup>, Atsu  
6 Godsway Kpordorlor<sup>3</sup>, Samuel Lissah<sup>5</sup>, Senanu Djokoto<sup>6</sup>, Matilda Aberese-Ako<sup>3</sup>, Evelyn  
7 Ansah<sup>3</sup>.

8  
9 <sup>1</sup> Hohoe Municipal Health Directorate, Ghana Health Service, P.O. Box 27, Hohoe, Volta  
10 Region, Ghana

11 <sup>2</sup> Evangelical Presbyterian Health Services, Evangelical Presbyterian Headquarters, P.O. Box  
12 HP 18, Ho, Volta Region, Ghana

13 <sup>3</sup> Institute of Health Research, University of Health and Allied Sciences, PMB 31, Ho, Volta  
14 Region, Ghana

15 <sup>4</sup> Savana Signatures, P.O. Box TL 332, Tamale, Northern Region, Ghana

16 <sup>5</sup>Department of Agricultural Sciences and Technology, Faculty of Applied Sciences and  
17 Technology, Ho Technical University, Ghana

18 <sup>6</sup>Regional Health Directorate, P.O. Box 72, Ho, Volta Region, Ghana

19  
20 Corresponding author

21 \*ebelinwisdom@gmail.com

22

23

24

25 **NOTE: This preprint reports new research that has not been certified by peer review and should not be used to guide clinical practice.**

26

27

28

29

30

## 31 **Abstract**

32 **Introduction:** The novel coronavirus (COVID-19) is characterised by loads of fake news and  
33 misinformation, which can influence vaccine acceptance. According to the World Health  
34 Organisation, implementing a harmonized public health strategy during an outbreak  
35 necessitates effective community engagement and communication, which facilitates public  
36 trust and decision-making. This study explored the role of community engagement in the  
37 acceptance of COVID-19 vaccine in the midst of fake news and misinformation in two  
38 municipalities in Ghana.

39 **Method:** A qualitative case study was employed using in-depth interviews with government  
40 officials from the Ghana Health Service, Municipal Assembly, Information Services  
41 Department and the National Commission on Civic Education and community gatekeepers.  
42 Additionally, focus group discussions were conducted with a cross-section of community  
43 members to understand the role of community engagement in vaccine acceptance. Qualitative  
44 analysis software Nvivo 12 was used to support thematic coding and analysis. All ethical  
45 procedures and COVID-19 preventive protocols were observed.

46 **Results:** Study participants reported the sources of fake news and misinformation about the  
47 COVID-19 vaccines from interpersonal communication, the radio, and a popular anti-vaccine

48 song. Some of the factors contributing to vaccine hesitancy were community members believed  
49 in the fake news and misinformation, low trust in the government and public institutions, and  
50 the lack of extensive education on COVID-19 vaccines. The Ghana Health Service was the  
51 most successful in engaging communities to promote vaccine acceptance in the midst of fake  
52 news and misinformation. It leveraged on its existing community-based health planning and  
53 services (CHPS) programme, which engaged the communities frequently through routine  
54 programmes such as durbars, antenatal clinics, child welfare clinics, and other community  
55 programmes to carry out engagement.

56 **Conclusion:** For Ghana to promote uptake of health interventions, it is important that  
57 communities are effectively engaged. This can be done through the provision of resources to  
58 responsible government institutions for community engagement. The gains made by  
59 government institutions during the pandemic can be sustained through continued community  
60 engagement, which will empower them to contribute towards population health.

## 61 **1.0 Introduction**

62 Pandemics claim millions of lives when they strike (1). In the absence of an effective treatment,  
63 the right information effectively communicated can save lives (2). This therefore requires that  
64 health information is provided by scientific experts, medical personnel or health authorities (3).  
65 Effective communication builds public trust and encourages people to adopt a recommended  
66 behavior (4). In the case of the novel COVID-19 pandemic, vaccination has been  
67 recommended as the most effective way of curbing the spread of the disease and saving lives  
68 (5). Sadly though, epidemics according to Wardle and Derakhshan (2017) are often  
69 characterized by loads of fake news. For instance it has been reported that during the Ebola  
70 epidemic, there was the fake news that anti-Ebola tablets had fatal consequences on people and  
71 that the vaccine was effective only for people from the white race (7). Similarly, during an

72 outbreak of Hepatitis A in San Diego between 2016- 2018, there was dangerous misinformation  
73 that the vaccine could lead to autism . The novel coronavirus (COVID-19) has been  
74 characterised by huge amounts of misleading and false information about the virus and the  
75 vaccines (8). According to Bernard et.al., (2021), information that is inconsistent with the facts  
76 about the natural history, epidemiology, and clinical outcomes of COVID-19 have been  
77 produced from all kinds of sources including the political and scientific world (Bernard et al.,  
78 2021), as well as from the social media (11). (11) have noted that false stories about COVID-  
79 19 have become so common that it has become difficult to distinguish fake news from the truth  
80 The World Health Organization (WHO) has in fact warned the public that the world is in battle  
81 over another type of epidemic called ‘infodemics’ which it defines as the spread of fake news,  
82 false information, and false scientific claims. In Vietnam for example, evidence shows that  
83 fake information on COVID-19 is more than the official and reliable information given by the  
84 authorities (12). Similarly, studies show that fake news and misleading information have  
85 become so popular in China and India that the Indian government has resorted to the drastic  
86 measure of turning off the internet to curb the spread of rumors (13). In the U.S.A., extensive  
87 use of social media caused many people to share and rely on false information related to the  
88 corona virus (14).

89 Sub-Saharan Africa has been flooded by tons of fake information related to COVID-19 (15).  
90 According to Osuagwu and others, one such misinformation is that COVID-19 has only slight  
91 effects on Blacks compared to Whites (15). In Nigeria for example misinformation and fake  
92 news proliferated mainly because the sharers of those news thought they were helping others  
93 just as their culture demanded (11). In Ghana, limited community education fuelled  
94 proliferation of misinformation on COVID-19 and its vaccines such as the COVID-19 vaccine  
95 is a chip being implanted in the human body and have resulted in fear, vaccine hesitancy (16),  
96 and has been observed as a threat to public health (11). According to WHO, culturally

97 appropriate communication can give positive results during an outbreak (World Health  
98 Organization, 2018). Additionally, implementing a harmonized public health strategy during  
99 an outbreak necessitates effective communication (18) because effective communication is the  
100 main public trust driver (19). Research evidence has also shown that people are more likely to  
101 trust government and believe in vaccination only if they are properly and effectively educated  
102 (20). Not only does communication clear doubts in the public's mind but also helps them make  
103 the right decision as they will neither over-nor underestimate the severity of the outbreak (21).  
104 According to the WHO, vaccine hesitancy is a severe threat to global health (World Health  
105 Organization, 2017). Vaccine hesitancy is defined as a delay in the uptake or the refusal of  
106 vaccines, despite the availability of vaccination services (23). Several factors can be posited  
107 for vaccine hesitancy such as religious persuasion, misinformation, and lack of proper  
108 orientation regarding the scientific basis of vaccines and the result of widespread  
109 misinformation across multiple social media channels (24). The Ghana Government made  
110 several efforts in engaging its citizens to accept the COVID-19 vaccine through some  
111 governmental institutions. The Ghana Health Service (GHS) regularly held press briefings to  
112 provide a situational report on COVID-19 and educate the populace about the COVID-19  
113 vaccine. Also, health personnel involved in the vaccination program sensitized the general  
114 public about the safety, efficacy, possible side effects, and benefits of receiving the COVID-  
115 19 vaccine, which has aided in the acceptance and uptake of the vaccines (25). Furthermore, to  
116 promote uptake of the vaccine, the Ghana government adopted multi-faceted health education  
117 approaches, such as use of print, electronic and social media. These communications strategies  
118 were led by the Ministries of Information and Communication, Information Services  
119 Department, Ministry of Health and Ghana Health Service (GHS) (26). Ghana administered  
120 28,515,854 doses of the COVID-19 vaccine as of December 2023 and as at April 07, 2024 the  
121 country had 21 active cases (GHS., 2024). The country dedicated the month of July, 2024 to

122 intensify efforts at administering 500,000 doses of the COVID-19 vaccines to persons 18 years  
123 and above (Ghanaweb, 2024) Despite government efforts to promote the uptake of the  
124 COVID-19 vaccine, findings of a study conducted by Manu et al (2024) indicated that  
125 misconceptions about the COVID-19 vaccine persists in the Volta Region. This qualitative  
126 research study therefore explored how fake news and misinformation influenced vaccine  
127 hesitancy and the role of community engagement in promoting vaccine acceptance in Volta  
128 Region, Ghana.

## 129 **2.0 Methods**

130 This section presents details of the methods used for the study.

### 131 **2.1. Study design**

132 The study used a case study approach employing in-depth interviews and focus groups to  
133 explore and describe how community engagement was utilised to promote the COVID-19  
134 vaccine acceptance in the midst of fake news and misinformation in two municipalities in the  
135 Volta Region of Ghana. The study presented how these communities experienced the  
136 engagement process. Using in-depth interviews (IDIs) and focus group discussions (FGDs),  
137 the study explored in-depth knowledge on the Ghanaian government's initiative through  
138 government institutions such as the Municipal Assembly, Ghana Health Service (GHS),  
139 Information Services Department (ISD) the National Commission on Civic Education (NCCE)  
140 and community experiences.

### 141 **2.2. Study areas**

142 The Volta Region was chosen for the study because it recorded a low vaccine acceptance rate  
143 (32.50%)(27). Two municipalities dubbed Municipality A\* and Municipality B\* were

144 purposively selected for the study, because they were among the most urbanized municipalities  
145 in the region. The choice was aimed at understanding how urban populations engage with the  
146 healthcare system and other governmental entities in providing health interventions. Both  
147 municipalities have a fair proportion of the rural population and Municipality B also has  
148 migrant settlements mostly made up of persons from the Republic of Togo, with which it shares  
149 boundaries.

150 The Ghana Health Service operates a decentralized administrative system with offices at the  
151 national, regional, municipal levels, sub-district offices, hospitals, health centers, and  
152 Community-based Health Planning and Services (CHPS) compound in each region (28) . To  
153 ensure that the study was reflective of the different levels of health service delivery, a multi-  
154 stage random sampling technique was used to select a sub-municipality and a CHPS facility  
155 for the study. In the first stage, the names of all the sub-municipal health directorates in each  
156 study municipality were obtained from the respective Municipal Health Directorates. They  
157 were written on pieces of paper, which were folded and an observer selected one sub-  
158 municipality each from the two municipalities for the study. In the second stage, all CHPS  
159 compounds under the two selected sub-municipalities were written on pieces of paper, which  
160 were folded and the observer randomly picked one. To ensure that community experiences  
161 were also captured in the study, a third stage was included, which concerned writing down the  
162 names of communities under each selected CHPS zone , folding it, and letting the observer  
163 randomly selected two (one from each municipality) to participate in the study.

### 164 **2.3. Selection of study participants and sampling**

165 From each of the study sites, one Municipal Health Directorate Officer, one sub-municipal  
166 health leader, two health providers from the selected CHPS facility, one official from the

167 Municipal Assembly, NCCE, and ISD respectively, and some of the community elders were  
168 purposively sampled to participate in IDIs (Table 1). A cross-section of women, men, and  
169 migrants of different age groups who were available and willing to participate in the study were  
170 conveniently sampled to participate in FGDs consisting of 6 to 13 participants. The interviews  
171 sought to understand how the Municipal Assembly, GHS, NCCE, and the ISD engaged  
172 communities toward the COVID-19 vaccination rollout and uptake. Saturation was attained  
173 when no new information was obtained from study participants, which is in accordance with  
174 qualitative inquiry (29). Participation was voluntary and those who were not interested were  
175 automatically excluded, as well as those who were mentally challenged.

176 **Table 1: List of data collection methods and categories of respondents**

| Study participants who participated in IDIs                | Municipality |   |
|------------------------------------------------------------|--------------|---|
|                                                            | A            | B |
| District Health Officials (1 municipal and 1 sub district) | 2            | 2 |
| Frontline workers in CHPS compounds                        | 2            | 2 |
| District Assembly officials                                | 1            | 1 |
| National commission for civic education                    | 1            | 1 |
| Information services department                            | 1            | 1 |
| Chiefs and queen mothers                                   | 2            | 2 |
| Community Elders                                           | 2            | 2 |



|                                                                                                                   |           |           |
|-------------------------------------------------------------------------------------------------------------------|-----------|-----------|
| Religious Leaders (Christian, Moslem, Traditionalist)                                                             |           |           |
| Herbalists                                                                                                        | 2         | 2         |
| Assembly persons                                                                                                  | 1         | 1         |
| Community healthcare volunteers                                                                                   | 2         | 2         |
| <b>Total</b>                                                                                                      | <b>18</b> | <b>18</b> |
| <b>Study participants for FGDs</b>                                                                                |           |           |
| Women below 30 years                                                                                              | 8         | 8         |
| Women above 30 years                                                                                              | 10        | 8         |
| Men below 30 years                                                                                                | 9         | 9         |
| Men above 30 years                                                                                                | 9         | 8         |
| *Migrant men                                                                                                      | 0         | 7         |
| Migrant women                                                                                                     | 0         | 7         |
| <b>Total</b>                                                                                                      | <b>36</b> | <b>47</b> |
| *Municipality A does not have migrant settler communities; thus, no interviews were conducted for such a category |           |           |

177 Source: Field work 2021

178

179 The three components of the WHO's definition of community engagement (categories of  
180 stakeholders, processes used to engage communities, and the purpose of the engagement), were  
181 used to guide the selection of the stakeholders, design of the IDI and FGD guides and to  
182 determine the focus of the study, which was on COVID-19 interventions (details of the  
183 questions for each spectrum of engagement has been included as appendix 1). This manuscript  
184 is drafted from a larger study and other aspects have been published (30).

## 185 **2.4. Training of data collectors and quality control**

186 Four graduate data collectors were trained by the first author, MA, a medical and organizational  
187 anthropologist, on qualitative data collection methods including interviewing and writing field  
188 notes and also seeking informed consent, which equipped them with the needed skills for data  
189 collection. The IDI and FGD guides for community members were translated into the native  
190 language Ewe during the training and research assistants were trained in English and the local  
191 language.

192 To ensure rigor, the study guides were pre-tested among eligible participants from a  
193 municipality similar to the municipalities selected for the study. The pre-testing process also  
194 guided in the revision of the guides to ensure its validity and reliability.

## 195 **2.5. Data collection, management and analysis**

196 In-person interviews were conducted in English with the government officials (health workers,  
197 NCCE officials, ISD officials and assemblymen) and in Ewe with the community members.  
198 Migrants were interviewed in French, as majority of them were from Togo and could not speak  
199 English nor the Ewe dialect spoken in Ghana. Interviews were recorded using a digital audio  
200 recorder and later transcribed verbatim to preserve respondents' views and experiences. The

201 average duration of IDIs was 50 minutes and FGDs was one hour. Meetings were held between  
202 MA and the data collectors every week to ensure the trustworthiness of data.

203 Transcribed data (IDIs and FGDs) were uploaded onto a computer and transferred onto a  
204 qualitative software NVivo 12, to support data coding. The data was triangulated and analyzed  
205 thematically. Deductive and inductive coding were carried out by LK, WE, AK and MK  
206 through carefully reading data, thinking critically and paying attention to the study questions,  
207 which were based on the five spectrum of community engagement (28). MA validated the  
208 codes by cross checking them with the study questions and with a sample of study participants'  
209 responses. Matrixes were developed from the coded data to support further analysis. The  
210 themes were generated from the analysis report on how government institutions conducted  
211 engagement activities in the two study municipalities to address vaccine acceptance in the  
212 midst of fake news and misinformation, challenges, gaps, future plans, community experiences.  
213 Other aspects of the study have been reported in other articles(Aberese-Ako et al., 2024;  
214 Aberese-Ako et al., 2023).

## 215 **2.6. Ethics**

216 The University of Health and Allied Sciences (UHAS) Research Ethics Committee (REC)  
217 approved the study (UHAS-REC A.5 [51 20-21]). Potential study participants were approached  
218 and informed of the study and those who were willing to participate were taken through a  
219 consenting process. The consent form contained the following information: purpose,  
220 procedure, contact details of the principal investigator and the REC administrator, plan to  
221 disseminate study findings, date of consent, and signature columns for the interviewer and  
222 interviewee. Two copies of the consent form were completed, one was given to the study  
223 participant and the second copy was kept by the study team. Participation was voluntary and

224 those who were not interested were automatically excluded, as well as those who were mentally  
225 challenged and persons under 18 years old. COVID-19 protocols were observed throughout the  
226 study. Interview participants were offered disposable masks and their hands were sanitized  
227 before consenting and participating in the interview. The data sets were anonymized to protect  
228 study communities and participants' identities and were accessible to only the study team.

229 Community entry was carried out in the study municipalities and study communities. The study  
230 team visited and sought permission from all gatekeepers (municipal chief executives,  
231 municipal health directors, CHPS compounds, officials of the NCE, and ISD, Assembly  
232 members, chiefs, and opinion leaders in the two municipalities).

## 233 **3.0 Results**

234 Findings are presented on the types and sources of misinformation and fake news concerning  
235 the COVID-19 vaccines and factors that contributed to their proliferation in the study  
236 communities. Results on how government institutions dealt with the misinformation and the  
237 effect their response had on the community members' willingness to vaccinate were also  
238 presented.

### 239 **3.1 Fake news and misinformation**

240 All study participants reported that they were aware of the rumours about the vaccines. These  
241 rumours according to the majority of the participants were negative, while a few stated that  
242 they heard positive stories. Study participants who reported that they heard negative  
243 information about the vaccines said they heard the vaccine was aimed at reducing the  
244 population of Africa. They explained that the vaccine was aimed at making African men  
245 impotent and African women infertile. Majority of the participants also reported that the

246 vaccine could cause disability or death, either instantly or a few years after vaccination. Study  
247 participants also claimed that they heard that the COVID-19 vaccines administered in European  
248 countries were different from the ones being administered in African countries including  
249 Ghana. A few of the participants reported that they heard that the vaccine could result in  
250 Africans getting inclined towards homosexuality, while others reported that the vaccine could  
251 render Africans mentally retarded so that the whites would be able to take over the resources  
252 in the future. Others reported that they heard that the vaccine was a form of a sim card being  
253 injected into people's bodies, to make it possible for whites to control them remotely and a  
254 participant reported that he was told that those who took the vaccine turned into animals.

255 *“When we hear these stories, we become scared. When they developed the vaccine in*  
256 *the US, they halted its use but they are telling us to take it. There is no company in*  
257 *Africa that produces vaccines. It is only those from the outside world and these guys*  
258 *have plotted to make us extinct. We are scared of the vaccine. The whites want to take*  
259 *over Africa due to our natural resources, so they want to decrease our population. They*  
260 *are giving us this vaccine to make us infertile or to cause us to die. They are*  
261 *experiencing tsunamis and other natural disasters, so they want to run to Africa. ... I*  
262 *heard that when you take the vaccine, after some years to come, a man could meet his*  
263 *fellow man on the street and start having sexual feelings for him. Due to the vaccine*  
264 *men could sleep with their fellow men. These whites hid something in the vaccine which*  
265 *can be used to control you from wherever they are located. You will only do their*  
266 *biddings unknowingly or unwillingly.” (FGD Participant, Male Migrants, Municipality*  
267 *B)*

268 *“The concern that people shared was that the whites that developed the vaccine also*  
269 *at times make some medicines that are poisons. The doctors do not know it is poison,*

270 *they see it only as vaccine. The same way, the Coronavirus came and everyone is afraid*  
271 *of its vaccine, saying that if they should take it, their life expectancy will be reduced.*  
272 *That is why people do not want to take the vaccine.” (Male volunteer, Municipality A)*

273 On the other hand, a few participants were also misinformed that the vaccine could prevent  
274 COVID-19 completely and give long life to those accepting it and that it could prevent any  
275 other disease: *“They said that when we take the vaccine, no disease will affect us.” (FGD*  
276 *Females less than 30 years, Municipality A)*

277 Study participants reported that fake news and misinformation made them afraid and  
278 discouraged them from getting vaccinated.

279 *“Our president his Excellency Nana Akufo Addo brought a number of them [COVID-*  
280 *19 vaccines] and they injected the health workers earlier. Recently I heard that he said*  
281 *he has made plans for 20,000 vaccine doses for Ghana. But the fear ...is that there is*  
282 *no assurance about the safety of the vaccine and whether it will be beneficial. So, I*  
283 *myself have said that when the vaccine comes, I will not take the injection because of*  
284 *the things and the information I am hearing.” (Pastor- Municipality A)*

### 285 **3.2 Sources of misinformation and fake news**

286 Majority of the study participants reported that they heard fake news about the COVID-19  
287 vaccine from friends and relatives in their communities and also from the media such as the  
288 radio and television. A few participants also indicated that they heard such news from  
289 acquaintances who live abroad and through newspapers.

290 *“But COVID-19 vaccination, they said AstraZeneca vaccination, we heard it in the*  
291 *news, on radios, in papers, media and internet that Indian government is the one*  
292 *producing this vaccine.” (Pastor- Municipality A)*

293           *“I forgot some important points... These whites hid something in the vaccine which can*  
294           *be used to control you from wherever they are located. You will only do their biddings*  
295           *unknowingly or unwillingly. The most intelligent Africans who are all abroad are*  
296           *feeding us with some of these information.”* (Male participant, FGD, Migrants  
297           Municipality B)

298   Interestingly, all the study participants also reported having heard that the vaccine was not good  
299   by listening to a song composed by a Ghanaian artist in one of the Ghanaian languages (Ewe).  
300   Another popular source was through social media platforms particularly WhatsApp platforms.

301           *“No matter how ill I am, I only use herbs. When I squeeze the herbs with water and*  
302           *drop some lemon in it. That’s all I use. Whatever illness comes I only use herbs. I say*  
303           *even if I’m coughing, I will only chew ginger. That injection I am not taking it. The*  
304           *injection I’m not taking it. That injection I’m not taking it. The thieves have deceived*  
305           *themselves. The injection I’m not taking it....If I get a Dzemeni herb [explain the*  
306           *Dzemeni herb here] and mix it with neem tree leaves and mix it with ‘devetsui’ (local*  
307           *name of a certain herb) and add some milk, then I’ve become a pharmacist. ...My body*  
308           *is very strong. That injection I’m not taking it. Never...My mother won’t take it; my*  
309           *wife won’t, my child won’t. ...I will follow the ways of my forefathers. All their teachings*  
310           *I no fit forget. Full Ewe man [indigenes from the Volta region], I won’t fall in any trap*  
311           *that the white is setting. I will only stick to the herbs. It has always been there for us*  
312           *since ages and I came to meet it. The injection I’m not taking it. I’m not taking it.”*  
313           (Lyrics of the song titled *Abi*, translated from Ewe into English by *authors*, 2021)

314           *“Also, it has spread on all social media platforms that the vaccine is fake, and some*  
315           *people also did videos and voice notes on WhatsApp platforms that they should not*  
316           *accept the vaccine. So that is what destroyed everything. Many people heard it because*

317 *everybody got up and started sharing it on social media platforms. So that information*  
318 *reached the entire community and people do not trust anything about it again. It will*  
319 *be very difficult before it will completely go off the minds of people.” (Community*  
320 *Elder, Municipality A)*

321 *“It is because of what we heard that they will come and inject us to die, they want to*  
322 *clear off human race, they want to clear off the blacks and all that. When corona came,*  
323 *there were a lot of rumours on our WhatsApp platforms.” (Community Elder*  
324 *Municipality B)*

325

### 326 **3.3 Factors accounting for belief in fake news and misconceptions** 327 **and the willingness to vaccinate**

328 Interactions with study participants suggested that factors such as lack of trust in the Ghanaian  
329 government, contributed to the spread and success of fake news.

330 Study participants distrusted the Ghanaian government because of the varying number of  
331 COVID-19 cases reported by the Ghana health service. Sometimes the cases rose and other  
332 times it dropped. They felt that the government’s motive was to mislead the general populace  
333 in order to raise funds for some individuals to benefit. Also, study participants believed that the  
334 government was corrupt, so the West was using it by giving it money in order to get the  
335 government to mislead the citizenry to take the vaccines. Consequently, they were unwilling  
336 to vaccinate.

337 *“...the cases, as they say it has increased in Ghana, it is up, it is down, it is a camouflage*  
338 *from the Government to raise funds into the pockets of some individuals to use. ...So,*



339 *that trust was not there for some time. ... we do not have 100% trust in the government*  
340 *concerning COVID-19.”* (Church Leader, Municipality A)

341 *“Our governments are like idols. When their faces are turned in a direction because*  
342 *of money; that is the only thing they see. These whites know they can only get us through*  
343 *the government. They gave them money to entice us so that when we take it, they give*  
344 *us something small and they get to keep the rest of the money. The government cannot*  
345 *tell me to take the vaccine and I will go for it, never. It is a deception.”* (FGD, Male  
346 Migrants, Municipality B)

347 Some of the study participants believed that the vaccine was effective, however, the health  
348 workers were not competent, so they were administering the vaccine wrongly. The level of  
349 distrust was extended to childhood immunisations as community members became suspicious  
350 of health workers who usually visited their homes to vaccinate children, which resulted in the  
351 refusals of such vaccines.

352 *“Before any drug will be imported into the country, it is checked with the computer to*  
353 *ascertain its potency and efficiency. So, I believe the vaccine is good but the healthcare*  
354 *workers didn’t give the injections well and that is what led to the problems.”* (FGD,  
355 Male Above 30 Years, Municipality B)

356 *“... Even it came to a point where they [health workers] cannot even go to the houses*  
357 *to give normal [routine childhood] immunizations. People will not even bring out their*  
358 *children to be immunised, because of the corona [COVID-19] vaccine. They are afraid*  
359 *that it is the coronavirus vaccine”* (Community Elder, Municipality B)

360 Study participants mostly relied on other community members, rumours, and radio programs  
361 as their main source of information on the COVID-19 vaccine.

362 *“There are a lot of misconceptions about this vaccine, fertility issues, so many. They*  
363 *talk about it anytime we go for communal labour: ‘Oh the government wants to kill us;*  
364 *they want to stop us from giving birth.’ So, a lot of them do not really get information*  
365 *about the vaccine... sometimes when we hear it, we just have to come in and give them*  
366 *education.”* (Assemblyman, Municipality A).

367 *“I’ve not been to school before. I am an Okada rider. I only work with the hearsays I*  
368 *hear around ”* (FGD, Migrants Male 30 years and above, Municipality B).

369 Many radio stations and TV stations reported the fake news that were circulating on the  
370 COVID-19 vaccine. Most participants demonstrated a high trust in the media, so once any  
371 information was reported by the media, they believed it.

372 *“Yes, we believe everything that comes from these media platforms, they are so valid.*  
373 *So especially when you hear it on radio. Like these elderly ones, they will say ‘oh, we*  
374 *have all heard it on radio already.”* (Church Elder, Municipality B)

375 *“On the radio station. I heard on Citi that there is no assurance about the safety of the*  
376 *vaccine and whether it will be beneficial. I said that I heard it on Citi Breakfast news*  
377 *from Mohammed\* [a Ghanaian journalist] and his team. I heard it from Lorlorny*  
378 *major news as well as Heritage FM. GBC too. All the media houses all over. I heard it*  
379 *personally.”* (Church Leader, Municipality A)

380 Some participants believed that COVID-19 was not yet in Ghana, while others were of the view  
381 that the number of cases reported in the country was actually less than what was being reported  
382 by government officials. Others said that the burden of the disease had reduced in the  
383 population, so, there was no need for a vaccine, and easily believed or spread the fake news  
384 they heard about it.

385           “... the disease has not come to Africa, so why are they bringing the vaccine!”

386           (Community Elder, Municipality A)

387           “Even if the government brings the vaccine right now, it would be difficult to take it,

388           because as it stands now, the burden of the disease has reduced and it is left with us to

389           take care of ourselves, and follow the safety protocols.” (FGD, Females 30 Years and

390           Above, Municipality B)

391           Some study participants who experienced severe adverse events following Immunization with

392           other antigens in the past, whilst others also witnessed close relatives experience adverse side

393           events after taking the COVID-19 vaccine were reluctant to vaccinate. As such they found it

394           easy to believe and inform others that the vaccine was harmful.

395           “..., when one of my children took the vaccine, it really disturbed him. The injection

396           site got swollen and he had to go to a different hospital to be attended to before he was

397           fine. One of my siblings also had a swollen face after taking the vaccine; so it has

398           created some fear in me.” (FGD, Female Participant above 30 Years, Municipality B)

399           Another factor for the refusal to vaccinate had to do with individuals personal perceptions on

400           vaccination. Some reported that they were afraid of needles and being injected with them.

401           “Now, in actual fact, some of us do not like taking injections. Not only the COVID-19

402           vaccine. Like coming to the hospital right now and you tell me that you are going to

403           inject me, then you will not see me again... So, I fear a lot that they will use a needle

404           and pierce me.” (Church Elder, Municipality B)

405           Few study participants had a misconception that the vaccine was meant to treat COVID-19, so,

406           there was no reason why they should vaccinate since they were not sick. Others on the other

407           hand, still sought to know whether the fake news and misconceptions were true.

408           *“My concern is, I am not sick so, why should I take the vaccine? And here lies the case,*  
409           *they said after vaccination, I need to wear the nose mask, still sanitize, and practice*  
410           *social distancing. So why should I vaccinate? I have been following all these protocols*  
411           *and have not contracted the disease. Why then should I get vaccinated and experience*  
412           *the reactions it comes with?”* (Opinion leader, Municipality A)

413           *“I just want to know if what (referring to the rumours they heard about the vaccine) we*  
414           *heard about the vaccine are true,”* (FGD, Migrants Females Municipality B)

415   Some of the study participants reported that they had not received adequate information on the  
416   COVID-19 vaccines and so they were not willing to take it. Others reported that they were not  
417   properly informed by the government on the Covid-19 vaccine. As such, they indicated that  
418   they had not received ample education about the vaccine and so they needed to be educated in  
419   order to help them get over the misconceptions before they will take the vaccines.

420           *“I will think about it because we have not received in-depth teaching about the vaccine*  
421           *and due to that, we have kept the notion that they want to reduce our population. If the*  
422           *vaccine is brought now, I would not take it. However, when there is in-depth teaching*  
423           *and I understand and accept the teaching, I would take it.”* (FGD, males 30 years and  
424           above, Municipality B)

425   A noteworthy factor that made it easy for misinformation on the COVID-19 vaccine to thrive  
426   was the community members previous experience on the truncated Ebola trial in Ghana. The  
427   study region was earmarked as an Ebola trial centre. However, Participants believed that they  
428   were being used for a clinical trial on the COVID-19 vaccine.

429           *“For the COVID-19 vaccine, I have not heard anything about it but what I heard from*  
430           *the time of Ebola was, normally in the Volta Region, Municipality A and certain areas*

431 *of Oti are used for vaccine testing. It came up during the Ebola pandemic.”* (Opinion  
432 Leader, Municipality A)

433 Study participants also reported that they had alternative sources of care such as herbs and  
434 alcohol that was working for them. They believed their herbs were powerful enough to offer  
435 them immunity against COVID-19 and even cure them if they got COVID-19. Some added  
436 that their forefathers took herbs and lived longer, so they too are taking herbs and that is what  
437 is sustaining them

438 *“Taking herbal medicine is better. It is the herbal medicine that our forefathers too*  
439 *drank and they lived longer. I have also been using the herbs and got to this stage. So,*  
440 *if you are taking a good herb, you will live long.”* (IDI, Herbalist/Fetish Priest,  
441 Municipality B)

442 *“My colleague just mentioned the strong alcohol. However, when you get herbs that*  
443 *have not been polluted by fertilizers, they would get you healed. This is because even*  
444 *when you go to the hospital, the drugs are made from herbal extracts.”* (FGD, males  
445 above 30, Municipality B)

446 *“Our herbs are more powerful than that vaccine.”* (FGD, females above 30 years,  
447 Municipality B)

448 **3.4 Government’s community engagement efforts to counter fake**  
449 **news and misinformation and its influence on community**  
450 **acceptance of vaccination**

451 The Ghanaian government through its institutions such as the municipal assembly, the Ghana  
452 Health Service, the Information Services Department, and the National Commission for Civic  
453 Education carried out various community engagement activities such as meeting with  
454 community groups, elders, and community members to inform them about the vaccine and to  
455 encourage them to take the vaccine.

456 The Ghanaian government’s strategy to dispel the fake news concerning the COVID-19  
457 vaccine included a weekly broadcast of the president on COVID-19 update, the televising of  
458 the president, the vice president, their spouses, and other prominent dignitaries such as chiefs  
459 and religious leaders receiving their COVID-19 vaccine. Health workers and other essential  
460 workers in the fight against COVID-19 were also among the first group of people to take the  
461 vaccine. Some of the government officials such as health workers, NCCE officials and ISD  
462 officials also took their vaccines in public, while some of the health workers recorded them and  
463 showed the videos and pictures to their clients and communities within their districts to  
464 motivate community members to vaccinate against the COVID-19 virus. *“It is through*  
465 *education and they was the president taking the vaccine, the vice president, the former*  
466 *president Kufuor on the television ([ISD Director Municipal B](#)).*

467 Government officials reported that they engaged the various communities through existing  
468 mediums such as community durbars, opinion leaders, religious bodies, various associations  
469 such as drivers and traders associations, and radio programs.

470 *“Initially we had this public health emergency management committee. So as part of*

471 *their plans, they identify various groups in the community. For example, we have the*  
472 *market women or market traders' groups, we have drivers' unions or moto bike riders*  
473 *and other associations of small-scale industries operating in the municipality, then we*  
474 *also have the chiefs. So we engage these groups at a particular time. When we engage*  
475 *them, we also listen to them and we give them the message on how to prevent the spread*  
476 *of the disease. We also encourage the various institutions at the community level to*  
477 *engage the subjects and educate them on the disease. So it was good. I can give you an*  
478 *example. For example, when we met the drivers, we told them to always make sure*  
479 *everybody is in a nose mask before getting in their vehicles. So if you're not in a nose*  
480 *mask, they insist that you buy one around and put it on before joining their vehicle.”*  
481 [\(Deputy Director of Municipal A Assembly\)](#)

482  
483 Also, majority of the government officials interviewed expressed concern that the President of  
484 Ghana and the Ghana Health Service had announced that the second dose of the COVID-19  
485 vaccine would arrive four weeks after the first dose was administered. However, the second  
486 dose delayed by over 12 weeks, significantly contributing to public distrust in the government  
487 and leading many Ghanaians refusing to take the COVID-19 vaccine when it was made  
488 available.

489  
490 *"We are already doing that. We go on radio every now and then to talk about the*  
491 *vaccine. But now that the people are demanding for the second dose and we are not*  
492 *getting it, we are not able to go to the radio station to talk about it. If we go and talk*  
493 *about it and they ask for the vaccine, what would we do? So, now, we are mute for the*  
494 *meantime. When we receive it, we would let them know that we have received it and I*  
495 *know they would come in their numbers to take it.”* (Health Director of Municipal B)

496

497        \_ *“With regards to COVID-19 vaccination, generally, my personal concern is the*  
498        *delay in the second jab. I think the delay is too much. When word goes out that the*  
499        *second dose can be taken after let’s say a maximum of four weeks, it should be four*  
500        *weeks. Once it delays, it creates room for any misconceptions to come up. And those*  
501        *are what might be affecting the others who are willing to or considering to take the*  
502        *jab later from probably changing their mind. So, once we have given a timeline, let’s*  
503        *stick to it.”* (Sub District In-Charge of Health Center Municipal B)

504

505        The Ghana Health Service also utilised routine health care programs such as Child Welfare  
506        Clinics, Antenatal clinics, Post-natal clinics to inform clients about the vaccine roll-out. They  
507        informed and educated the communities that the companies that manufacture the COVID-19  
508        vaccines were similar multi-national companies based in the developed countries that  
509        manufacture vaccines for their children against poliomyelitis, yellow fever, measles, and other  
510        childhood killer diseases; so if they wanted to wipe out Africans, they could have done so using  
511        earlier developed vaccines rather than the COVID-19 vaccines.

512        *“If you listen to the radio, you’d hear people saying they would not take the*  
513        *vaccine because it is a plan by the Western world to kill Africans and they’ll never*  
514        *take it and they’re urging the public never to get vaccinated. So, when the vaccine*  
515        *came, we used the radio stations to educate them and tell them vaccines have existed f*  
516        *or long. We have been immunizing the children with polio, tetanus, and other*  
517        *vaccines.”* (Director NCCE Municipal A)



### 518 **3.5 Impact of limited engagement in addressing misinformation** 519 **on decision to vaccinate**

520 The engagement process contributed to some of the study participants changing their mind  
521 towards vaccination, nevertheless, others had already been influenced by the misinformation  
522 and myths and for that matter were unwillingly to be vaccinated.

523 A few participants were indecisive and testified that they might change their minds and take  
524 the vaccine if the following conditions are fulfilled, 1. They are informed and educated about  
525 the vaccine, 2. others take the vaccine and nothing happens to them and 3. they are sure that  
526 they would experience no side effects after taking it.

527 *“When it is brought, I would wait for other people to take it and if nothing happens to*  
528 *them, I would also take it.”* (FGD, female migrants, Municipality B)

529 *“That is what I have said in my own case. They have said that the government has gone*  
530 *for the vaccine to kill people. Per my thought, as I have earlier said, I believe the*  
531 *government cannot go for vaccines because its citizens are sick and then he will inject*  
532 *them and those who are not sick will also die. I do not believe that the government can*  
533 *do such a thing. But since then, we heard that the vaccine was received in some places*  
534 *and people received it. For me, I am also waiting for the vaccine so that when it comes,*  
535 *if some people will not take it or if I will not take it, then it is up to me,”* (Chief,  
536 Municipality A)

537 *“If I am well educated and I understand everything about it, I will take it. But if I ask*  
538 *questions and they are not well explained to me, then, I will not take.”* (Opinion Leader,  
539 Municipality A)

540 Very few of the participants revealed they had no reservations about the COVID-19 vaccine  
541 while others reported that due to the fear that they have towards the COVID-19 virus, they will  
542 accept the vaccine.

543 *“I have no concerns. When it comes, I will take it.”* (Community Elder, Municipality  
544 A)

545 *“The reason why I accept to take it is because of the fear of the virus. That is why I*  
546 *said when it comes, I will take it so that I won’t contract the virus.”* (Volunteer,  
547 Municipality A)

548 Despite the engagement efforts made by the government institutions to get community  
549 members to vaccinate some were not convinced, some community members still distrusted the  
550 efforts from the president and other government institutions to vaccinate.

551 *“First, I do not know if the vaccine they will inject me with is the one they injected our*  
552 *president with. His vaccine may be different. Maybe, the one they injected him with is*  
553 *not the one they will inject me with for me to become paralyzed. That is why I am scared*  
554 *of taking the vaccine.”* (FGD, males above 30 years, Municipality A)

555 *“My concern is, I am not sick so, why should I take the vaccine and here lies the case,*  
556 *they said after vaccination, I need to wear the nose mask, still sanitize and practice*  
557 *social distancing. So why should I vaccinate? I have been following all these protocols*  
558 *and have not acquired the disease. Why then should I get vaccinated and experience*  
559 *the reactions it comes with?”*(Opinion leader, Municipality A)

560

561 Failure to have been engaged about the COVID-19 vaccine caused majority of the participants  
562 to reject the vaccine even if that would mean death. Most participants reported that they

563 preferred continuing the protocols and stated that they would not even allow their relatives to  
564 take the vaccine.

565 *“They first have to be educated. Honestly, if you should bring that vaccine*  
566 *tomorrow, everybody will run away.”* (Traditionalist, Municipality A)

567 *“Even though the coronavirus also leads to death, it should rather kill us when*  
568 *we get infected. It is better than dying from the vaccine.”* (FGD, females above  
569 30 years, Municipality B)

570 *“I am scared that if I take the injection, I will die and leave my children.”* (FGD,  
571 females less than 30 years, Municipality A)

### 572 **3.6 Recommendations from the study participants on how they** 573 **will like to be engaged concerning misinformation and uptake of** 574 **the COVID-19 vaccination**

575 Study participants reported that they were ready to take the COVID-19 vaccine once they were  
576 properly educated. They stated that this education should be channelled through the community  
577 elders and health workers in their communities. They would like to be engaged about the  
578 vaccine. A Few participants also recommended that Africans also manufacture their own  
579 vaccines and that will motivate them to take the vaccine.

580 *“For that one, it is necessary that the health directorate officials should come and give*  
581 *us more education. They should come and give detailed education about the vaccine*  
582 *and that is the only way it will be accepted. But if there is no education like how they*

583 *have been telling us to wash our hands and others, nobody will accept it. More*  
584 *education is necessary”.* (Assembly member, Municipal B)

585 *“Africa should also set up a company that can manufacture vaccines for its members.*  
586 *Madagascar came out with a herbal cure for COVID-19 but the World Health*  
587 *Organization rejected it because it is from Africa. The God who created us, is He not*  
588 *on the side of Africans? Or the brain or knowledge given to the Whites, wasn’t it given*  
589 *to Africans? Does it mean that we can only rely on drugs from the Whites and we cannot*  
590 *manufacture any for them to use? These diseases like COVID-19, Ebola, and the rest*  
591 *were engineered in the lab by the Whites. They also created COVID-19 to kill us. Why*  
592 *can’t African leaders think and come out with their own solutions to this disease?*  
593 *Because it appears it is the same Whites manufacturing the cure for the disease again.*  
594 *If Africans get the cure or the vaccine, we will take it, if not we will not accept it.”*  
595 (FGD, Male Migrants, Municipality B)

596 They further added that they would like to be educated on the vaccine and only then would  
597 they be willing to agree to be vaccinated. Persons they wanted the government institutions to  
598 involve in the engagement process were their chiefs, the community elders, the assemblymen.

599 *“Sincerely speaking, if the government comes to work with the community to settle on*  
600 *level grounds, then we would change our mindset. However, if they don’t come to work*  
601 *with us to settle on level grounds, nothing would change.”* (FGD, males 30 years and  
602 above, Municipality B)

603 In the same vein, all participants reported they would like to be informed about the vaccine.  
604 Most study participants stated that they were not engaged in planning of the COVID-19 vaccine  
605 roll out but were engaged in activities to fight COVID-19 itself. Regarding the COVID-19  
606 vaccine, few participants reported to have only been informed about it through the radio.

607 However, they reported neither to have been involved in planning, nor been consulted,  
608 collaborated with, or empowered to take the vaccine.

609 *“They also spoke about it on the radio. The District Director of Health Services went*  
610 *on the radio and spoke about it. And so, in our various homes, we listened to the*  
611 *information given to us.” (Assemblyman, Municipality A)*

612 *“Not yet! They did not take any steps and came to individuals like that yet. You are the*  
613 *first person to ask me concerning these plans...Planning assiduously has not surfaced*  
614 *that I know of...” (Pastor, Municipality A)*

615

## 616 **4.0 Discussion**

617 This qualitative case approach used in-depth interviews and focus group discussion to explore  
618 fake news and misinformation and how they influenced the decision to vaccinate in two  
619 municipalities in Ghana and how community engagement contributed to willingness to  
620 vaccinate. The study found that study participants had many sources of information, however,  
621 they were predominantly exposed to vaccine-related misinformation through social media,  
622 friends, and local media outlets, most of these sources provided fake news, which misinformed  
623 them. The extensive dissemination of inaccurate information, primarily through social media  
624 and community channels, influenced community members’ decisions regarding vaccination.  
625 Such misinformation ranged from distortions about the vaccine’s intent to outright conspiracy  
626 theories concerning its safety and efficacy. This finding corroborates the literature that suggests  
627 that social media is a dual-edged sword that offers access to both accurate and misleading  
628 information (Joseph et al., 2022; Muric et al., 2021; Naeem & Bhatti, 2020; Skafle et al.,

629 2022).The United Nations has noted that this dual exposure complicates the community's  
630 ability to distinguish credible information from falsehoods, thereby fostering vaccine hesitancy  
631 (36). According to Skafle et al. (2022). Misinformation about COVID-19 vaccines spread on  
632 social media platforms includes medical misinformation, vaccine development, and  
633 conspiracies, with twitter being the most studied platform.

634 The prevalent myths encountered in this study, such as vaccines causing infertility or being a  
635 conduit for colonial control, reflect a deep-seated mistrust in external health interventions, a  
636 sentiment echoed in the literature as well (Awan et al., 2022; Kassi et al., 2021; Kern et al.,  
637 2023). In addition, a critical aspect of the misinformation was the belief that vaccines  
638 distributed in Africa were different from those in Europe, intensifying fear and resistance. A  
639 similar finding was reported by Gunawardhana et al. (2022) that 85% of participants believed  
640 the COVID-19 vaccines available in Africa were less effective than those available in Europe.  
641 This belief undermines public health efforts and highlights the necessity for transparent  
642 communication from health authorities to dispel such myths and reinforce the global standard  
643 and safety of the vaccines administered. Moreover, inaccurate information concerning COVID-  
644 19 vaccination is more likely to be believed by some conservative religious groups in the US,  
645 according to recent studies (41). Sharing fake news is a real challenge as people cannot  
646 distinguish between what is true and what is false which deviates them from searching for  
647 information from relevant professionals (37). Furthermore, considering the powerful influence  
648 of religious leaders and their institutions, members who trust these religious leaders are more  
649 likely to believe in COVID-19 myths and false information.

650 Our findings also underscore a significant gender and socio-economic disparity in  
651 susceptibility to fake news, with male participants, particularly those with lower educational  
652 and economic backgrounds, more prone to accepting and spreading misinformation. This

653 observation aligns with Almenar et al's. (2021) study, which found that men are more likely to  
654 receive fake news. Another study highlighted that men were generally more susceptible to  
655 gender biases in fake news, indicating a higher prevalence of fake news consumption among  
656 male individuals (43). The challenge here extends beyond mere exposure to misinformation; it  
657 involves addressing the foundational reasons that make these demographics more vulnerable,  
658 such as lack of access to reliable information and critical engagement with the content they  
659 receive.

660 Despite efforts by the Ghanaian government and health services to combat misinformation  
661 through public vaccination campaigns and community engagement, it is evident in our study  
662 that these measures were met with scepticism and limited success. This scepticism was partly  
663 due to distrust in governmental transparency and the integrity of public health initiatives (Lee  
664 & Li, 2021). The study's results align with findings from De Freitas et al. (2021), emphasising  
665 that trust in government and health institutions plays a crucial role in public receptiveness to  
666 vaccination campaigns. Furthermore, this distrust had a spillover effect on routine childhood  
667 immunizations, which saw a decline as parents conflated their fears about the COVID-19  
668 vaccine with general vaccine mistrust. This trend is alarming and highlights a broader public  
669 health crisis where misinformation about a single vaccine affects broader perceptions and  
670 acceptance of other essential vaccines.

671 The distrust of COVID-19 vaccines became so bad that it had a trickle-down effect on  
672 vaccinations for children. Resulting in distrust of health workers resulting in parents being  
673 unwilling to vaccinate their children against the six childhood killer diseases. This has  
674 historical bearing as the region has consistently recorded low rates of childhood vaccination in  
675 the country (45). Similarly, the WHO reported that COVID-19 lockdowns and fears of its  
676 transmission at health facilities routine immunization rates dropped between 2019 and 2020

677 in Ghana. For instance coverage of the third dose of pertussis-containing vaccine (DTP3),  
678 crucial for protecting against diseases like diphtheria and tetanus, declined from 99% to 97%,  
679 leaving over 32,000 Ghanaian children vulnerable (WHO Africa,2023) . Now, the government,  
680 with support from the World Health Organization (WHO) and partners, is intensifying efforts  
681 to restore immunization rates, aiming to reach the children who missed vaccinations, return to  
682 pre-pandemic levels, and strengthen the overall vaccination program” (World Health  
683 Organisation, 2023).

684 Further, we observed that the pervasive nature of misinformation significantly heightened  
685 vaccine hesitancy. Participants expressed fear of severe adverse reactions and doubted the  
686 vaccine’s efficacy, with many preferring to rely on natural immunity or traditional remedies.  
687 This hesitancy is underpinned by a lack of accurate knowledge and an overreliance on  
688 anecdotal and often misleading information from non-scientific sources. The gravity of this  
689 issue is highlighted in studies by Joseph et al. (2022) and Wilson and Wiysonge (2020), who  
690 noted that misinformation could drastically reduce vaccination rates and increase public health  
691 risks. Similarly, other studies have observed that misinformation has led to increased vaccine  
692 hesitancy and reduced adherence to public health measures, posing a threat to global health  
693 efforts (Muric et al., 2021; Skafle et al., 2022).

694 Our study further revealed participants’ clear desire for more effective and inclusive strategies  
695 to combat misinformation surrounding COVID-19 vaccinations. They recommended that  
696 engagement efforts should be spearheaded by trusted community figures such as chiefs, elders  
697 and health workers, who are perceived as more credible and approachable. These figures should  
698 be well-equipped with accurate and relevant information to address specific concerns and  
699 debunk prevalent myths. This validates (48) who echoed the importance of involving  
700 traditional and religious leaders in vaccination campaigns. According to them, these leaders,



701 being trusted community figures, play a crucial role in restoring public trust in vaccines. Aside,  
702 Cooper et al. (2018) emphasised the need for interventions by trusted community members to  
703 address vaccine hesitancy and improve vaccination rates. Additionally, the participants  
704 suggested that such educational campaigns should be conducted through familiar and  
705 accessible platforms, including local community meetings, radio programmes, and social  
706 media channels tailored to the local dialects and cultural contexts. Emphasising the importance  
707 of transparency, they proposed that the government and health institutions should openly share  
708 information about vaccine sourcing, safety protocols, and efficacy studies to build trust.  
709 Moreover, there was a strong recommendation for the establishment of local vaccine  
710 production to reduce dependency on foreign vaccines, which they believed would significantly  
711 increase trust and acceptance among the community members (Makenga et al., 2019;  
712 Mohammed et al., 2023). This approach underscores a holistic strategy that not only  
713 disseminates information but also fosters a sense of ownership and trust in health interventions.

## 714 **5.0 Recommendation and conclusion**

715 Misinformation about the COVID-19 vaccine is widespread, which affects COVID-19 vaccine  
716 acceptance and can affect the possibility of acceptance of future vaccines if the lessons learned  
717 are not well used to correct gaps in the engagement process. It is therefore recommended that  
718 the government allocates resources to institutions such as the GHS, NCCE, and ISD to enable  
719 them to implement and intensify community engagement efforts to promote acceptance of the  
720 COVID-19 vaccine. Additionally, going forward, it is important that communities are engaged  
721 prior to the introduction of new vaccines. This is likely to improve awareness on facts about  
722 the vaccines, which would therefore prevent fake news from thriving. It is also recommended  
723 that media personalities such as journalists should be educated on the COVID-19 virus and  
724 media houses charged with the delivery of factual information about the vaccine to the public.

## 725 **References**

- 726 1. Huremović D. Psychiatry of Pandemics: A Mental Health Response to Infection  
727 Outbreak. *Psychiatry Pandemics A Ment Heal Response to Infect Outbreak*. 2019;1–  
728 185.
- 729 2. Al Knawy B. Global Data and Digital Public Health Leadership for Current and Future  
730 Pandemic Responses. *Front Digit Heal*. 2021;3(January):2–4.
- 731 3. Ahinkorah BO, Ameyaw EK, Elvis J, Jr H, Seidu A aziz, Schack T. Rising Above  
732 Misinformation or Fake News in Africa : Another Strategy to Control COVID-19  
733 Spread. 2020;5(June):2018–21.
- 734 4. Garrett L. COVID-19: the medium is the message. *Lancet* [Internet].  
735 2020;395(10228):942–3. Available from: [http://dx.doi.org/10.1016/S0140-](http://dx.doi.org/10.1016/S0140-6736(20)30600-0)  
736 [6736\(20\)30600-0](http://dx.doi.org/10.1016/S0140-6736(20)30600-0)
- 737 5. Goldstein E, Lipsitch M, Cevik M. On the effect of age on the transmission of SARS-  
738 CoV-2 in households, schools, and the community. *J Infect Dis*. 2021;223(3):362–9.
- 739 6. Wardle C, Derakhshan H. Information disorder: Toward an interdisciplinary  
740 framework for research and policymaking. *Inf Disord Towar an Interdiscip Framew*  
741 *Res policy Mak* [Internet]. 2017;20–5. Available from: [https://rm.coe.int/information-](https://rm.coe.int/information-disorder-report-november-2017/1680764666?ct=t())  
742 [disorder-report-november-2017/1680764666?ct=t\(\)](https://rm.coe.int/information-disorder-report-november-2017/1680764666?ct=t())
- 743 7. Azim D, Nasim S, Kumar S, Hussain A, Patel S. Neurological consequences of 2019-  
744 nCoV infection: a comprehensive literature review. *Cureus*. 2020;12(6).
- 745 8. van der Linden S, Roozenbeek J, Compton J. Inoculating Against Fake News About  
746 COVID-19. *Front Psychol*. 2020;11(October):1–7.

- 747 9. Bernard D, Francis S. When your audience is your channel: Facebook for behavior  
748 change. *Entertain Behind Scenes Case Stud Theory Pract*. 2021;311–22.
- 749 10. Bernard A, Cottenet J, Bonniaud P, Piroth L, Arveux P, Tubert-Bitter P, et al.  
750 Comparison of cancer patients to non-cancer patients among COVID-19 inpatients at a  
751 national level. *Cancers (Basel)*. 2021;13(6):1436.
- 752 11. Apuke OD, Omar B. Modelling the antecedent factors that affect online fake news  
753 sharing on COVID-19: the moderating role of fake news knowledge. *Health Educ Res*.  
754 2020;35(5):490–503.
- 755 12. Huynh TLD. Does culture matter social distancing under the COVID-19 pandemic?  
756 *Saf Sci*. 2020;130:104872.
- 757 13. Rodrigues UM, Xu J. Regulation of COVID-19 fake news infodemic in China and  
758 India. *Media Int Aust*. 2020;177(1):125–31.
- 759 14. Pennycook G, McPhetres J, Zhang Y, Lu JG, Rand DG. Fighting COVID-19  
760 misinformation on social media: Experimental evidence for a scalable accuracy-nudge  
761 intervention. *Psychol Sci*. 2020;31(7):770–80.
- 762 15. Osuagwu UL, Miner CA, Bhattarai D, Mashige KP, Oloruntoba R, Abu EK, et al.  
763 Misinformation about COVID-19 in sub-saharan africa: Evidence from a cross-  
764 sectional survey. *Heal Secur*. 2021;19(1):44–56.
- 765 16. Alhassan RK, Nketiah-Amponsah E, Immurana M, Abuosi AA. Financing COVID-19  
766 vaccination in sub-Saharan Africa: lessons from a nation-wide willingness to pay  
767 (WTP) survey in Ghana. *BMC Public Health*. 2022;22(1):1273.
- 768 17. Organization WH. WHO report on surveillance of antibiotic consumption: 2016-2018  
769 early implementation. 2018;

- 770 18. Oren O, Nuriel P, Kylander-Clark ARC, Haviv I. Evolution and Propagation of an  
771 Active Plate Boundary: U-Pb Ages of Fault-Related Calcite From the Dead Sea  
772 Transform. *Tectonics*. 2020;39(8):e2019TC005888.
- 773 19. Vergara-Merino L, Meza N, Couve-Pérez C, Carrasco C, Ortiz-Muñoz L, Madrid E, et  
774 al. Maternal and perinatal outcomes related to COVID-19 and pregnancy: an overview  
775 of systematic reviews. *Acta Obstet Gynecol Scand*. 2021;100(7):1200–18.
- 776 20. Blanchard A, Camera S, Carbone C, Cardone VF, Casas S, Clesse S, et al. Euclid  
777 preparation-VII. Forecast validation for Euclid cosmological probes. *Astron  
778 Astrophys*. 2020;642:A191.
- 779 21. Paek HJ, Dewhirst T, Hove T. Can removing tar information from cigarette packages  
780 reduce smokers' misconceptions about low-tar cigarettes? an experiment from one of  
781 the world's lowest tar yield markets, South Korea. *Nicotine Tob Res*. 2020;22(6):990–  
782 6.
- 783 22. Organization WH. WHO model list of essential medicines, 20th list (March 2017,  
784 amended August 2017). 2017;
- 785 23. Marti-Carvajal AJ, Sola I, Lathyris D, Dayer M. Homocysteine-lowering interventions  
786 for preventing cardiovascular events. *Cochrane database Syst Rev*. 2017;(8).
- 787 24. McCarthy E, DeViva JC, Na PJ, Pietrzak RH. New-onset and exacerbated insomnia  
788 symptoms during the COVID-19 pandemic in US military veterans: A nationally  
789 representative, prospective cohort study. *J Sleep Res*. 2022;31(1):e13450.
- 790 25. Afrifa-Anane GF, Larbi RT, Addo B, Agyekum MW, Kyei-Arthur F, Appiah M, et al.  
791 Facilitators and barriers to COVID-19 vaccine uptake among women in two regions of  
792 Ghana: A qualitative study. *PLoS One [Internet]*. 2022;17(8 August):1–17. Available

- 793 from: <http://dx.doi.org/10.1371/journal.pone.0272876>
- 794 26. Alhassan RK, Owusu-Agyei S, Ansah EK, Gyapong M. COVID-19 vaccine uptake  
795 among health care workers in Ghana: a case for targeted vaccine deployment  
796 campaigns in the global south. *Hum Resour Health [Internet]*. 2021;19(1):1–12.  
797 Available from: <https://doi.org/10.1186/s12960-021-00657-1>
- 798 27. Tchoualeu DD, Harvey B, Nyaku M, Opare J, Traicoff D, Bonsu G, et al. Evaluation  
799 of the impact of immunization second year of life training interventions on health care  
800 workers in Ghana. *Glob Heal Sci Pract*. 2021;9(3):498–507.
- 801 28. Ghana Health Service. Community-Based Health Planning and Services SEPTEMBER  
802 2016. 2016;(September):144.
- 803 29. Charmaz K. The power and potential of grounded theory. *Med Sociol online*.  
804 2012;6(3):2–15.
- 805 30. Aberese-Ako M, Ebelin W, Doegah PT, Kuatewo M, Kpodo L, Kpordorlor AG, et al.  
806 Promoting COVID-19 Vaccine Acceptance through Community Engagement: An  
807 Ethnographic Study in Ghana. *Adv Public Heal*. 2023;2023(1):3626862.
- 808 31. Aberese-Ako M, Doegah PT, Kpodo L, Ebelin W, Kuatewo M, Baba AA, et al. The  
809 role of community engagement toward ensuring healthy lives: a case study of COVID-  
810 19 management in two Ghanaian municipalities. *Front Public Heal*. 2024;11:1213121.
- 811 32. Joseph JJ, Deedwania P, Acharya T, Aguilar D, Bhatt DL, Chyun DA, et al.  
812 Comprehensive management of cardiovascular risk factors for adults with type 2  
813 diabetes: a scientific statement from the American Heart Association. *Circulation*.  
814 2022;145(9):e722–59.
- 815 33. Muric G, Wu Y, Ferrara E. COVID-19 vaccine hesitancy on social media: building a

- 816 public Twitter data set of antivaccine content, vaccine misinformation, and  
817 conspiracies. *JMIR public Heal Surveill.* 2021;7(11):e30642.
- 818 34. Naeem S Bin, Bhatti R. The Covid-19 ‘infodemic’: a new front for information  
819 professionals. *Heal Inf Libr J.* 2020;37(3):233–9.
- 820 35. Skafle I, Nordahl-Hansen A, Quintana DS, Wynn R, Gabarron E. Misinformation  
821 about COVID-19 vaccines on social media: rapid review. *J Med Internet Res.*  
822 2022;24(8):e37367.
- 823 36. Organization WH, Fund UNC. Levels and trends in child malnutrition: key findings of  
824 the 2020 edition. UNICEF/WHO/World Bank Group joint child malnutrition  
825 estimates. World Health Organization; 2020.
- 826 37. Awan TM, Aziz M, Ch TR, Jasam T, Alvi Y. Fake news during the pandemic times :  
827 A Systematic Literature Review using PRISMA. 2022;49–60.
- 828 38. Kassi LA, Shah S, Lawson AK, Feinberg EC, Swanson A, Pavone ME. Vaccine  
829 hesitancy and medical mistrust in women considering or undergoing fertility  
830 treatments. *Fertil Steril.* 2021;116(3):e363.
- 831 39. Kern J, Schippert C, Fard D, Bielfeld AP, von Versen-Höynck F. Fear of fertility side  
832 effects is a major cause for COVID-19 vaccine hesitance in infertile patients. *Front*  
833 *Med.* 2023;10:1178872.
- 834 40. Gunawardhana N, Baecher K, Boutwell A, Pekwarake S, Kifem M, Ngong MG, et al.  
835 COVID-19 vaccine acceptance and perceived risk among pregnant and non-pregnant  
836 adults in Cameroon, Africa. *PLoS One.* 2022;17(9):e0274541.
- 837 41. Melki J, Tamim H, Hadid D, Makki M, Amine J El, Id EH. Mitigating infodemics :  
838 The relationship between news exposure and trust and belief in COVID-19 fake news

- 839 and social media spreading. 2021;1–13. Available from:  
840 <http://dx.doi.org/10.1371/journal.pone.0252830>
- 841 42. Almenar E, Aran-Rampott S, Suau J, Masip P. Gender differences in tackling fake  
842 news: Different degrees of concern, but same problems. *Media Commun.*  
843 2021;9(1):229–38.
- 844 43. Sahadevan N, Deepak P. On Gender Bias in Fake News. *CoRR*. 2022;
- 845 44. De Freitas L, Basdeo D, Wang HI. Public trust, information sources and vaccine  
846 willingness related to the COVID-19 pandemic in Trinidad and Tobago: an online  
847 cross-sectional survey. *Lancet Reg Heal*. 2021;3.
- 848 45. Sheff MC, Bawah AA, Asuming PO, Kyei P, Phillips JF, Kachur SP, et al. Evaluating  
849 health service coverage in Ghana ’ s Volta Region using a modified Tanahashi model  
850 Evaluating health service coverage in Ghana ’ s Volta Region using a modified  
851 Tanahashi model. *Glob Health Action* [Internet]. 2020;13(1). Available from:  
852 <https://doi.org/10.1080/16549716.2020.1732664>
- 853 46. Joseph AM, Fernandez V, Kritzman S, Eaddy I, Cook OM, Lambros S, et al. COVID-  
854 19 misinformation on social media: a scoping review. *Cureus*. 2022;14(4).
- 855 47. Wilson SL, Wiysonge C. Social media and vaccine hesitancy. *BMJ Glob Heal*.  
856 2020;5(10):1–7.
- 857 48. Njoga EO, Awoyomi OJ, Onwumere-Idolor OS, Awoyomi PO, Ugochukwu ICI,  
858 Ozioko SN. Persisting vaccine hesitancy in Africa: the whys, global public health  
859 consequences and ways-out—COVID-19 vaccination acceptance rates as case-in-  
860 point. *Vaccines*. 2022;10(11):1934.
- 861 49. Cooper S, Betsch C, Sambala EZ, Mchiza N, Wiysonge CS. Vaccine hesitancy—a

862 potential threat to the achievements of vaccination programmes in Africa. *Hum Vaccin*  
863 *Immunother.* 2018;14(10):2355–7.

864 50. Makenga G, Bonoli S, Montomoli E, Carrier T, Auerbach J. Vaccine production in  
865 Africa: a feasible business model for capacity building and sustainable new vaccine  
866 introduction. *Front public Heal.* 2019;7:56.

867 51. Mohammed A, Idris-Dantata H, Okwor T, Tanui P, Paintsil E, Kabwe PC, et al.  
868 Supporting the Manufacturing of Medical Supplies in Africa: Collaboration Between  
869 Africa CDC, Partners, and Member States. *Glob Heal Sci Pract.* 2023;11(5).

870

871

872

873

874

875

876

877

## 878 **Data Availability**

879 The datasets used during the current study are available from the principal investigator of the  
880 study, Matilda Aberese-Ako ([maberese-ako@uhas.edu.gh](mailto:maberese-ako@uhas.edu.gh)) or from the Institute of Health  
881 Research ([ihr@uhas.edu.gh](mailto:ihr@uhas.edu.gh)) on reasonable request.

## 882 **Ethical Approval**



883 The protocol was submitted to the University of Health and Allied Sciences' Research Ethics  
884 Committee for approval (UHAS-REC A.5 [51 20-21])

### 885 **Consent**

886 Selection and participation in the study was purely voluntary and written informed consent  
887 was sought and obtained from all study participants. Participants who met the inclusion  
888 criteria and agreed to participate were taken through the consenting process such as the  
889 objectives, the study procedures, voluntariness, risks, benefits, and confidentiality of the  
890 ethical process.

### 891 **Disclosure**

892 COVID-19-related protocols were strictly observed throughout the study. Data collectors  
893 used face masks and sanitizers in all the activities. They observed social distancing at all  
894 times. Each study participant was provided with a face mask and their hands were sanitized  
895 before and after the consenting process.

### 896 **Conflicts of Interest**

897 All the authors declare that they have no conflicts of interest.

### 898 **Authors' Contributions**

899 MA and EA conceptualized the study. MA trained LK, WE, AK and MK to collect data, code  
900 and analyze the data. MK and WE drafted the results section under the supervision of MA  
901 and PD. WE and SL drafted the discussion the conclusion sections. SD revised the  
902 manuscript. All the authors reviewed the manuscript critically.

### 903 **Acknowledgments**

904 The authors thank the officials of the two municipalities, the participating District Health  
905 Management Teams, health facilities, and staff for their support and cooperation. The authors  
906 are grateful to community leaders and community members for their cooperation and support.

### 907 **Funding**

908 This study was funded by the Royal Society of Tropical Medicine and Hygiene's Small  
909 Grants Program.

910 \_\_\_\_\_

911
